# Supplementary material for: 18S rDNA Phylogeny of Lamproderma and Allied Genera (Stemonitales, Myxomycetes, Amoebozoa)
Source: PubMed Central journal article supplement (PMC3329430; doi:10.1371/journal.pone.0035359), 2012-04-18

## Supporting information S2

**A:** List of the primers used in this study and their sequences (5'-3'). Colours match the regions in the diagram (B), showing the approximative position of the primers. Primers in bold have been obtained during this work.

**B:** Schematic diagram of the SSU gene. Numbers indicate corresponding regions in the sequence of *Physarum polycephalum* X13160. Green bars show intron insertion positions and green labels show intron names.

**A**

|               | <b>FORWARD</b>           |                 | <b>REVERSE</b>          |
|---------------|--------------------------|-----------------|-------------------------|
| S1            | AACCTGGTTGATCCTGCC       | <b>SR4Dark</b>  | TGTCCTCTAATTGTTACTCGA   |
| S2            | TGGTTGATCCTGCCAGTAGTGT   | <b>SU19R</b>    | GACTTGTCTCTAATTGTTACTCG |
| S3            | GATCCTGCCAGTAGTGATGCG    | SR19            | ACAAGTCTGGTGCCAGCA      |
| SAPhy         | AATCTGCGAACGGCTCCGC      | 718R            | CGTTAAAGTTGTTGCGGTTA    |
| <b>S3Ste</b>  | GGGCTTCTGACCTATCAACTAG   | 753R            | GGTTAAAACGCTCGTAGTCGGC  |
| <b>S3Dark</b> | GTGCTTCTGACCTATCAACTAG   | S900R           | CCCCTTGATCAAGAGCGAAAG   |
| S414F         | GAAGGCAGCAGGCGCGCAACG    | <b>SR11</b>     | GCAATTCGGTCACCCCTCGAAC  |
| S4Myx         | AGCAGGCGCGHAACGTTCC      | <b>SR11T</b>    | GCAATTCGGTCACCCACGAAC   |
| <b>718FL</b>  | GTAATTCAGCTCTAATAGCATACG | <b>SR11G</b>    | GCAATTCGGTCACCCCGAAC    |
| 753F          | GTTAAAACGCTCGTAGTCGGC    | SR12            | GCGAAAGTTAAGGGTTCGAAG   |
| S11.5         | GTGGTAAAATACGTTGACCC     | <b>SR12'</b>    | ACCTTAACTTTTCGCTCTTGATC |
| S11atro       | GACCTATGGCGAAAGCTG       | SR13            | GGAGTATGGTCGCAAGGCTG    |
| <b>S11.7</b>  | TGATCAAGAGCGAAAGTTAAGGG  | <b>SR13U</b>    | TTCAGYCTTGCGRCCATACTCC  |
| S12m          | GACGATCAGATACCGTCGTAGTC  | <b>SR14</b>     | ACTCTTTGTGTGCCCTTCC     |
| S12'          | CAGATACCGTCGTAGTCTTAAC   | SR14.1          | CAAAGAGTGGAACCTGCGGC    |
| Ste12         | CTATAAATGATACTGGCCAGG    | SR15            | GTAAGTGGTGGTGCATGG      |
| S13           | GAGTATGGTCGCAAGGCTG      | SR15U           | GGTGGTGCATGGCCGTTT      |
| S13.5         | GAAACTTAAAGGAATTGACGG    | SR18            | TCCGATAACGAGCGAGAC      |
| S14           | TTGACGGAAGGGCACACA       | <b>S43R</b>     | ACCTGTTATTAACCCATTCA    |
| S14.5         | TAATTTGACTCAACACGGGG     | <b>SR26Ste</b>  | CCCAGRACATCTAAGGGCAT    |
| S15           | TAAGTGGTGGTGCATGGTC      | <b>S26R</b>     | CATCACTGACCTGTTATTGACC  |
| <b>S15C</b>   | TAAGTGGTGGTGCATGGCC      | <b>SR30Ste</b>  | ARGGCAGGGACGCATTCCG     |
| S18           | TCTTAGTTCGTGGAGTGG       | S44R            | CAGTCATGCCCTTAGATGTTT   |
| <b>S18Phy</b> | TCTTAGTTCGTGGATTGATTTG   | <b>SR50Dark</b> | AATCGGTAGCAGCGACGGG     |
| <b>S18'</b>   | ATTCCGATAACGAGCGAGAC     | <b>SRBE</b>     | TACCTTGTTACGACTTCTGC    |
| <b>S26F</b>   | CTTCTTAGACGTATCAGAGCC    | SRB             | GCCTAGAGGAAGCAGAAGTCG   |
| <b>S44F</b>   | GCCGATAAGGTTCTTGAAATGGG  | Rib2            | GGTAATCGTAGGTTAACCTGC   |
| <b>S46F</b>   | AGTCATGCCCTTAGATGTTT     | RibB            | GGTGAACCTGCAGAAGGATC    |
| <b>S30Phy</b> | ACGAATGCGTCCCTGCCCT      |                 |                         |

**B**

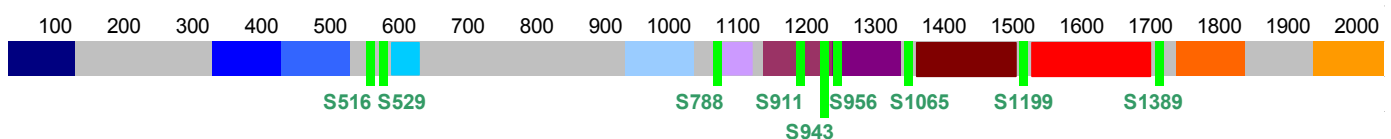

Supplement: pone.0035359.s002.pdf [file pone.0035359.s002.pdf]
